# Supplementary material
Source: Springer Nature journal article supplement (https://www.springermedizin.de/resource/supplementary/12958_2010_713_MOESM4_ESM.pdf/9568656)

**A**

UTP  $10^{-5}$  M

Suramin 0 0 30 100 300 600 [ $\mu$ M]

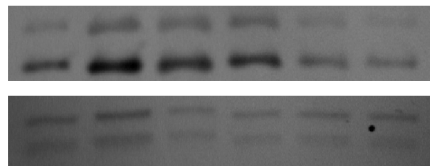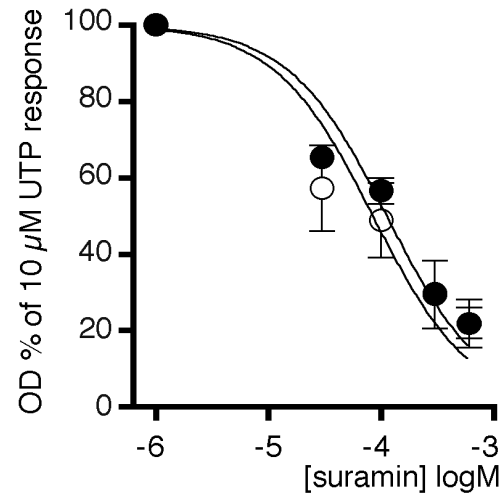**B**

UTP  $10^{-5}$  M

PPADS 0 0 30 100 300 600 [ $\mu$ M]

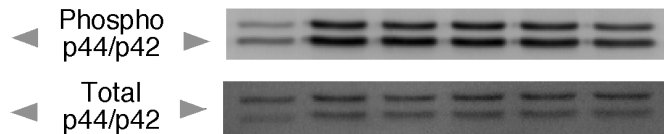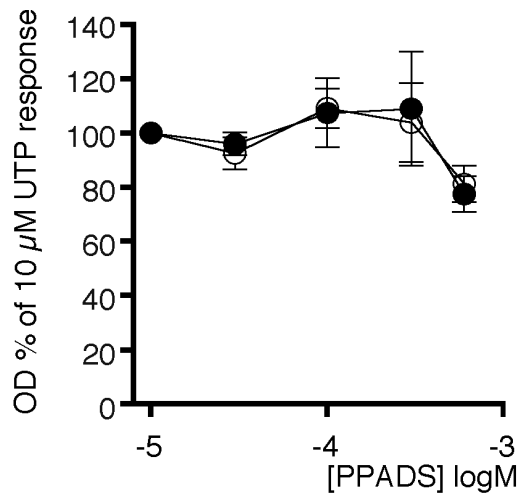

Supplement: MOESM4 [file 9568656]
